# Supplementary material
Source: HighWire-hosted journal article supplement (https://bmjopen.bmj.com/content/10/9/e040644)
Supplement: inline-supplementary-material-1 [file inline-supplementary-material-1.pdf]

**Supplementary 1: Summary of search strategy**

| Terms                                                                                                    | Database         | Number of articles     |
|----------------------------------------------------------------------------------------------------------|------------------|------------------------|
| (ace2[Title/Abstract]) OR ace 2[Title/Abstract] Filters: English                                         | Medline (PubMed) | 1980                   |
| (ace2 or ace 2).ab. and English.lg.                                                                      | Embase           | 2880                   |
| ace2 in Title Abstract Keyword OR ace-2 in Title Abstract Keyword - (Word variations have been searched) | Cochrane         | 35 trials and 1 review |
| (TS=(ace2 OR ace-2)) AND LANGUAGE: (English) AND DOCUMENT TYPES: (Article)                               | Web of science   | 1,931                  |
