# Supplementary material
Source: HighWire-hosted journal article supplement (https://bmjopen.bmj.com/content/10/9/e040644)
Supplement: inline-supplementary-material-2 [file inline-supplementary-material-2.pdf]

Supplementary Material 2: Table of studies at baseline

| Study             | Country     | Exposure drug(s)              | Duration of exposure | Subject / model tested | Site of ACE2 receptors measured | Sample size | Condition of subject / model      |
|-------------------|-------------|-------------------------------|----------------------|------------------------|---------------------------------|-------------|-----------------------------------|
| Abdel-Fattah 2018 | Egypt       | Telmisartan or Nimodipine     | 15 days              | Rat                    | Cerebral                        | 117         | Healthy                           |
| Abdelkader 2020   | Egypt       | Telmisartan and 17B-estradiol | 6 weeks              | Rat                    | Cerebral                        | 75          | Alzheimer's mouse model           |
| Abe 2015          | Japan       | Olmesartan                    | 24 weeks             | Human                  | Renal                           | 31          | Diabetic                          |
| Abuhashish 2017   | Egypt       | Captopril                     | 6 weeks              | Rat                    | Bone                            | Not stated  | Oestrogen deficient               |
| Agata 2006        | Japan       | Olmesartan                    | 4 weeks              | Rat                    | Cardiac                         | Not stated  | Hypertension                      |
| Aguilar 2011      | Spain       | atorvastatin                  | 8 weeks              | Rat                    | Cardiac                         | Not stated  | Diabetic                          |
| Ali 2018          | Netherlands | Pioglitazone or Vitamin D     | 14 days              | Rat                    | Renal                           | Not stated  | Renal Disease                     |
| Andersen, 2015    | Denmark     | Vitamin d                     | 3 weeks              | Rat                    | Not stated                      | 33          | Not stated                        |
| Araujo 2018       | Brazil      | Olmesartan                    | 10 days              | Hamster                | Oral                            | 10          | Not stated                        |
| Arumugan 2010     | Japan       | Candesartan                   | 4 weeks              | Rat                    | Cardiac                         | Not stated  | Healthy                           |
| Awwad 2019        | Egypt       | Pregabalin                    | Not stated           | Rat                    | Cerebral                        | Not stated  | Healthy                           |
| Awwad 2019        | Egypt       | Telmisartan or Captopril      | 21 days              | Rat                    | Cardiac                         | 8           | Heart failure                     |
| Azis 2019         | Malaysia    | Captopril/ Losartan           | 4 weeks              | Rat                    | Endothelial cells               | 7           | Hypertension                      |
| Badae 2019        | Egypt       | Enalapril                     | 4 weeks              | Rat                    | Cardiac                         | Not stated  | Heart disease                     |
| Bernardi 2015     | Not stated  | Eplerenone                    | 4 weeks              | Rat                    | kidney                          | 75          | Renal disease                     |
| Bukowska 2017     | Germany     | Oestrogen                     | 24 hours             | Human                  | Cardiac                         | 36          | Heart disease                     |
| Burchill 2008     | Australia   | Ramipril                      | 10 days              | Rat                    | Cardiac                         | 38          | Nephrectomy                       |
| Chen 2015         | China       | Perindopril or Losartan       | 12 weeks             | Human                  | Kidney                          | 110         | Diabetic + chronic kidney disease |

|                      |           |                                      |            |         |            |            |                     |
|----------------------|-----------|--------------------------------------|------------|---------|------------|------------|---------------------|
| Chodavarapu 2013     | USA       | Rosiglitazone                        | 8 weeks    | Mouse   | Not stated | 8          | Diabetic            |
| Dong 2019            | China     | Spironolactone                       | 8 weeks    | Rat     | kidney     | 85         | Diabetic            |
| Fagyas 2011          | Hungary   | Enalapril, Perindopril or Ramipril   | Not stated | Human   | unclear    | 375        | Not stated          |
| Feng 2020            | China     | Candesartan & Perindopril            | 4 weeks    | Rat     | Cerebral   | Not stated | Not stated          |
| Flores Monroy, 2016, | USA       | Captopril                            | 48 hours   | Rat     | heart      | Not stated | Heart disease       |
| Fuchs 2018           | USA       | Nicotine                             | 3 weeks    | Rat     | Cerebral   | 110        | Not stated          |
| Gallagher 2008       | USA       | Losartan                             | 12 hours   | Rat     | Cardiac    | Not stated | Not stated          |
| Gebaska 2013         | Poland    | Atorvastatin                         | 24 hours   | Rat     | Cardiac    | Not stated | Healthy             |
| Graus-Nunes 2019     | Brazil    | Losartan or Telmisartan              | 10 weeks   | Mouse   | Hepatic    | 20         | Not stated          |
| Guo, 2016            | China     | Telmisartan                          | 3 weeks    | Rat     | Pulmonary  | Not stated | Not stated          |
| Gupta 2012           | USA       | Ivabradine                           | 3 months   | Dog     | Cardiac    | 24         | Heart failure model |
| Hao 2013,            | China     | Imidapril                            | 30 days    | Chicken | Cardiac    | 24         | Not stated          |
| Hermenegildo 2015    | Spain     | Estradiol                            | 1 day      | Human   | Not stated | Not stated | Not stated          |
| Hermenegildo 2018    | Argentina | Estradiol                            | 24 hours   | Human   | Not stated | Not stated | Healthy             |
| Hiroi 2014           | Japan     | Olmesartan                           | 3 months   | Human   | Serum      | 8          | HTN                 |
| Ibarra-Lara 2016     | Mexico    | Captopril                            | 21 days    | Rat     | Cardiac    | Not stated | heart disease       |
| Ichikawa 2018        | Japan     | Olmesartan                           | 2 months   | Mouse   | Renal      | Not stated | Not stated          |
| Igase 2005           | USA       | Olmesartan, Atenolol, or Hydralazine | 14 days    | Rat     | Cardiac    | 60         | Hypertensive        |
| Igase 2008           | Japan     | Olmesartan                           | 14 days    | Rat     | Cardiac    | 10         | Hypertensive        |
| Iizuka 2009          | Japan     | Nifedipine                           | Not stated | Human   | Cardiac    | Not stated | Healthy cells       |
| Ishibashi 2014       | Japan     | Olmesartan                           | Not stated | Human   | Renal      | Not stated | Not stated          |

|                      |             |                            |            |       |                   |            |                            |
|----------------------|-------------|----------------------------|------------|-------|-------------------|------------|----------------------------|
| Ishiyama 2004        | Not known   | Losartan Olmesartan        | 28 days    | Rat   | Cardiac           | 62         | Post myocardial infarction |
| Iwanami 2013         | Japan       | Azilsartan or Olmesartan   | 4 weeks    | Mouse | Cardiac and renal | 10         | Healthy                    |
| Jeong 2018           | South Korea | Insulin or pravastatin     | 8 weeks    | Rat   | Cardiac           | 87         | Type 1 diabetic            |
| Jessup 2006          | USA         | Lisinopril or Losartan     | 12 days    | Rat   | Cardiac and renal | 27         | Hypertensive               |
| Jessup 2008          | USA         | Hydrochlorothiazide        | 7 days     | Rat   | Cardiac           | 48         | Hypertensive               |
| Kaiqiang 2009        | Japan       | Olmesartan                 | 16 weeks   | Rat   | Cardiac           | 16         | Cardiac hypertrophy        |
| Kidoguchi 2019       | Japan       | Azilsartan                 | 9 weeks    | Rat   | Renal             | 51         | Healthy                    |
| Kong 2019            | China       | Spironolactone             | Not stated | Rat   | Renal             | Not stated | Liver Disease              |
| Li 2011              | China       | Irbesartan                 | 12 weeks   | Rat   | Cardiac           | 39         | Diabetic                   |
| Li 2013              | China       | Rosuvastatin               | 29 days    | Rat   | Cardiac           | 36         | Unclear                    |
| Li 2016              | China       | Valsartan                  | 28 days    | Rat   | Cardiac           | 36         | Aortic injury              |
| Liang 2015           | USA         | Telmisartan                | 35 days    | Rat   | Cardiac           | 90         | Heart failure              |
| Lijuan 2013          | China       | Olmesartan                 | 3 days     | Mouse | Hepatic           | 42         | Not stated                 |
| Lin 2016             | China       | Calcitriol                 | Not stated | Rat   | Renal             | 25         | Diabetic                   |
| Ma 2018              | China       | Irbesartan, benazepril     | 12 weeks   | Human | Vaginal           | 36         | Not stated                 |
| Machado 2014         | Brazil      | Vitamin d                  | 12 weeks   | Rat   | Cardiac           | Not stated | Hypertension               |
| Malek 2019           | India       | Telmisartan                | 4 weeks    | Rat   | Renal             | 56         | Diabetes                   |
| Mao-liang Huang 2009 | China       | perindopril                | 4 weeks    | Rat   | Hepatic           | 30         | Healthy                    |
| Marquez 2013         | Spain       | Insulin                    | 14 days    | Rat   | Renal             | Not stated | Diabetic                   |
| Marquez 2014         | Spain       | Insulin                    | 2 days     | Mouse | Renal             | Not stated | Healthy                    |
| Ocaranza 2006        | Chile       | Enalapril                  | 8 weeks    | Rat   | Cardiac           | 83         | Not stated                 |
| Ohshima 2014         | Japan       | Azilsartan                 | 2 weeks    | Rat   | Cardiac           | 8          | Not stated                 |
| Onat 2018            | Turkey      | Amlodipine or Rosuvastatin | 4 weeks    | Rat   | Renal             | Not stated | Hypertension               |

|                      |             |                                   |           |       |                        |            |                                           |
|----------------------|-------------|-----------------------------------|-----------|-------|------------------------|------------|-------------------------------------------|
| Qiao 2015            | China       | Ibuprofen                         | 8 weeks   | Rat   | Cardiac                | 18         | Diabetes                                  |
| Riera 2014           | Spain       | Insulin                           | 40 days   | Mouse | Serum, urine and renal | 30         | Diabetes                                  |
| Romani-Perez 2015    | Spain       | Liraglutide                       | 14 days   | Rat   | Pulmonary              | 52         | Diabetes                                  |
| Sabry 2018           | Egypt       | Losartan                          | 6 weeks   | Rat   | Adipose tissue         | 48         | Diabetes                                  |
| Salem 2012           | USA         | Insulin                           | 24 hours  | Mouse | Renal                  | Not stated | Type 1 diabetes                           |
| Salem 2013           | USA         | Insulin                           | 30 days   | Mouse | Renal                  | 8          | Type 1 diabetes                           |
| Salem 2014           | USA         | Insulin                           | 20 weeks  | Mouse | Renal                  | Not stated | Type 1 diabetes                           |
| Sanchez Aguilar 2018 | Mexico      | Rosiglitazone                     | 7 days    | Rat   | renal                  | Not stated | Hypertension                              |
| Sanchez-Aguilar 2019 | Mexico      | Rosiglitazone                     | 7 days    | Rat   | Cardiac                | 12         | Aortic coarctation model                  |
| Scroggin 2012        | USA         | Rosiglitazone                     | 1 day     | Human | Cerebral               | Not stated | Not stated                                |
| Senador 2010         | USA         | Losartan                          | 8 weeks   | Mouse | Renal                  | 12         | Not stated                                |
| Shenoy 2009          | USA         | 17 $\beta$ -estradiol (E2)        | 6 weeks   | Rat   | Cardiac                | 18         | Bilaterally ovariectomized & hypertensive |
| Shimada 2011         | Japan       | Olmesartan                        | 2 weeks   | Rat   | Cerebral               | Not stated | Oestrogen-deficient                       |
| Shin 2017            | China       | insulin                           | 8 weeks   | Rat   | Cardiac                | 84         | Diabetes                                  |
| Soler 2009           | USA         | Telmisartan                       | 2 weeks   | Mouse | Renal                  | 11         | Not stated                                |
| Song 2012            | USA         | Candesartan                       | 19 days   | Rat   | Renal                  | Not stated | Not stated                                |
| Speth 2014           | USA         | Zinc                              | Real time | Rat   | Renal and Pulmonary    | Not stated | Not stated                                |
| Suh 2019             | South Korea | Olmesartan                        | 4 weeks   | Mouse | Renal                  | 16         | Alport mouse model                        |
| Sukumaran 2012       | Japan       | Telmisartan                       | 4 weeks   | Rat   | Cardiac                | 18         | Induced cardiomyopathy                    |
| Takai 2013           | Japan       | Valsartan; valsartan & amlodipine | 2 weeks   | Rat   | Cardiac                | 24         | Hypertension                              |

|                         |       |                                                                         |            |       |                   |            |                                     |
|-------------------------|-------|-------------------------------------------------------------------------|------------|-------|-------------------|------------|-------------------------------------|
| Tanno 2016              | Japan | Olmesartan & hydralazine                                                | 2 months   | Mouse | Cardiac           | 6          | Over-expressing renin               |
| Thanekar 2019           | USA   | Canagliflozin                                                           | 15 weeks   | Mouse | Urine             | Not stated | Diabetes                            |
| Varagic 2012            | USA   | Nebivolol                                                               | Not stated | Rat   | Cardiac           | 44         | Hypertension                        |
| Varagic 2012b           | USA   | Olmesartan                                                              | 6 weeks    | Rat   | Renal             | 28         | Hypertension                        |
| Wang 2012               | China | Fosinopril                                                              | 28 days    | Rat   | Cardiac           | 32         | Heart Disease                       |
| Wang 2013               | China | Oestrogen                                                               | 4 weeks    | Mouse | Ovarian           | 17         | Hypertension                        |
| Wang 2015               | China | Sildenafil                                                              | 30 minutes | Rat   | Cardiac           | 32         | Healthy                             |
| Wang 2016               | China | Enalapril                                                               | 30 minutes | Rat   | Cardiac           | 32         | Healthy                             |
| Wang 2016               | China | Olmesartan, Candesartan, Telmisartan, Losartan, Valsartan or Irbesartan | Not stated | Mouse | Cardiac           | 54         | Healthy                             |
| Wang 2018               | China | Telmisartan                                                             | 12 weeks   | Mouse | Cardiac           | 32         | Healthy                             |
| Weili 2014              | China | Ibuprofen, pioglitazone                                                 | 8 weeks    | Rat   | Cardiac           | Not stated | Not stated                          |
| Wosten-van-Asperen 2011 | USA   | Losartan                                                                | 4 hours    | Rat   | Pulmonary         | 48         | Acute respiratory distress syndrome |
| Wu 2015                 | China | Losartan or Enalapril                                                   | Not stated | Rat   | Cardiac           | Not stated | Aortic coarctation model            |
| Xiao 2016               | China | Captopril                                                               | Not stated | Pig   | Not known         | Not stated | Not stated                          |
| Xu 2017                 | China | Calcitriol                                                              | Not stated | Rat   | Pulmonary         | 30         | Lung injury                         |
| Yang 2013               | China | Enalapril                                                               | 4 weeks    | Rat   | Cardiac           | 25         | Hypertension                        |
| Yang 2018               | China | Telmisartan                                                             | 24 weeks   | Rat   |                   | 33         | Hypertension                        |
| Yisireyli 2018          | Japan | Irbesartan                                                              | 2 weeks    | Mouse | Intestinal        | 48         | Stress-induced mice                 |
| Young 2014              |       | Losartan                                                                | 72 hours   | Mouse | Renal             | Not stated | Kidney disease                      |
| Zhang 2011              | China | Enalapril or Losartan                                                   | 2 weeks    | Mouse | Cardiac           | 40         | Hydronephrotic                      |
| Zhang 2013              | China | Pioglitazone                                                            | 24 weeks   | Rat   | Serum and Hepatic | 30         | Healthy                             |

|               |       |                            |            |        |            |            |                         |
|---------------|-------|----------------------------|------------|--------|------------|------------|-------------------------|
| Zhang 2014    | China | Enalapril or Losartan      | 4 weeks    | Rat    | Cardiac    | 40         | Aortic ligation         |
| Zhang 2015    | China | Losartan                   | 12 weeks   | Rabbit | Cardiac    | 27         | Atherosclerosis         |
| Zhao 2015     | China | Linagliptin or liraglutide | 28 days    | Rat    | Cardiac    | 24         | Healthy                 |
| Zhao 2019     | China | Valsartan                  | 12 weeks   | Rat    | Cardiac    | 40         | Hypertension            |
| Zhong 2010    | China | Telmisartan                | 10 weeks   | Rat    | Cardiac    | Not stated | Hypertension            |
| Zhong 2011    | China | Telmisartan                | 10 weeks   | Rat    | Cardiac    | 40         | Hypertension            |
| Zhonghua 2013 | China | Telmisartan                | 4-12 weeks | Human  | Not stated | 62         | Hypertension + Diabetes |
