# Supplementary material
Source: HighWire-hosted journal article supplement (https://bmjopen.bmj.com/content/10/9/e040644)
Supplement: inline-supplementary-material-3 [file inline-supplementary-material-3.pdf]

### Supplementary Material 3: Risk of bias assessment

| Study             | Was the allocation sequence adequately generated and applied? | Were the groups similar at baseline or were they adjusted for confounders in the analysis? | Was the allocation adequately concealed? | Were the animals randomly housed during the experiment? | Were the caregivers and/or investigators blinded from knowledge which intervention each animal received during the experiment? | Were animals selected at random for outcome assessment? | Was the outcome assessor blinded? | Were incomplete outcome data adequately addressed? | Are reports of the study free of selective outcome reporting? | Was the study apparently free of other problems that could result in high risk of bias? |
|-------------------|---------------------------------------------------------------|--------------------------------------------------------------------------------------------|------------------------------------------|---------------------------------------------------------|--------------------------------------------------------------------------------------------------------------------------------|---------------------------------------------------------|-----------------------------------|----------------------------------------------------|---------------------------------------------------------------|-----------------------------------------------------------------------------------------|
| Abdel-Fattah 2018 |                                                               |                                                                                            |                                          |                                                         |                                                                                                                                |                                                         |                                   |                                                    |                                                               |                                                                                         |
| Abdelkader 2020   |                                                               |                                                                                            |                                          |                                                         |                                                                                                                                |                                                         |                                   |                                                    |                                                               |                                                                                         |
| Abe 2015          |                                                               |                                                                                            |                                          |                                                         |                                                                                                                                |                                                         |                                   |                                                    |                                                               |                                                                                         |
| Abuohashish 2017  |                                                               |                                                                                            |                                          |                                                         |                                                                                                                                |                                                         |                                   |                                                    |                                                               |                                                                                         |
| Agata 2006        |                                                               |                                                                                            |                                          |                                                         |                                                                                                                                |                                                         |                                   |                                                    |                                                               |                                                                                         |
| Anderson, 2015    |                                                               |                                                                                            |                                          |                                                         |                                                                                                                                |                                                         |                                   |                                                    |                                                               |                                                                                         |
| Araujo 2018       |                                                               |                                                                                            |                                          |                                                         |                                                                                                                                |                                                         |                                   |                                                    |                                                               |                                                                                         |
| Arumigan 2010     |                                                               |                                                                                            |                                          |                                                         |                                                                                                                                |                                                         |                                   |                                                    |                                                               |                                                                                         |
| Awwad 2019        |                                                               |                                                                                            |                                          |                                                         |                                                                                                                                |                                                         |                                   |                                                    |                                                               |                                                                                         |
| Awwad 2019        |                                                               |                                                                                            |                                          |                                                         |                                                                                                                                |                                                         |                                   |                                                    |                                                               |                                                                                         |
| Badae 2019        |                                                               |                                                                                            |                                          |                                                         |                                                                                                                                |                                                         |                                   |                                                    |                                                               |                                                                                         |
| Bernadi 2015      |                                                               |                                                                                            |                                          |                                                         |                                                                                                                                |                                                         |                                   |                                                    |                                                               |                                                                                         |
| Bukowska 2017     |                                                               |                                                                                            |                                          |                                                         |                                                                                                                                |                                                         |                                   |                                                    |                                                               |                                                                                         |
| Burchill 2008     |                                                               |                                                                                            |                                          |                                                         |                                                                                                                                |                                                         |                                   |                                                    |                                                               |                                                                                         |
| Chen 2015         |                                                               |                                                                                            |                                          |                                                         |                                                                                                                                |                                                         |                                   |                                                    |                                                               |                                                                                         |
| Chodavarapu 2013  |                                                               |                                                                                            |                                          |                                                         |                                                                                                                                |                                                         |                                   |                                                    |                                                               |                                                                                         |
| Dong 2019         |                                                               |                                                                                            |                                          |                                                         |                                                                                                                                |                                                         |                                   |                                                    |                                                               |                                                                                         |
| Fangyas 2011      |                                                               |                                                                                            |                                          |                                                         |                                                                                                                                |                                                         |                                   |                                                    |                                                               |                                                                                         |
| Feng 2020         |                                                               |                                                                                            |                                          |                                                         |                                                                                                                                |                                                         |                                   |                                                    |                                                               |                                                                                         |
| Fuchs 2018        |                                                               |                                                                                            |                                          |                                                         |                                                                                                                                |                                                         |                                   |                                                    |                                                               |                                                                                         |
| Furuhashi 2014    |                                                               |                                                                                            |                                          |                                                         |                                                                                                                                |                                                         |                                   |                                                    |                                                               |                                                                                         |
| Furuhashi 2015    |                                                               |                                                                                            |                                          |                                                         |                                                                                                                                |                                                         |                                   |                                                    |                                                               |                                                                                         |
| Gallagher 2008    |                                                               |                                                                                            |                                          |                                                         |                                                                                                                                |                                                         |                                   |                                                    |                                                               |                                                                                         |
| Gebska 2013       |                                                               |                                                                                            |                                          |                                                         |                                                                                                                                |                                                         |                                   |                                                    |                                                               |                                                                                         |
| Graus-Nunes 2019  |                                                               |                                                                                            |                                          |                                                         |                                                                                                                                |                                                         |                                   |                                                    |                                                               |                                                                                         |
| Guo 2016          |                                                               |                                                                                            |                                          |                                                         |                                                                                                                                |                                                         |                                   |                                                    |                                                               |                                                                                         |
| Gupta 2012        |                                                               |                                                                                            |                                          |                                                         |                                                                                                                                |                                                         |                                   |                                                    |                                                               |                                                                                         |

|                      |  |  |  |  |  |  |  |  |  |  |
|----------------------|--|--|--|--|--|--|--|--|--|--|
| Hao 2013             |  |  |  |  |  |  |  |  |  |  |
| Hermenegil 2018      |  |  |  |  |  |  |  |  |  |  |
| Hermenegildo 2015    |  |  |  |  |  |  |  |  |  |  |
| Hiroi 2014           |  |  |  |  |  |  |  |  |  |  |
| Ibarra-Lara 2016     |  |  |  |  |  |  |  |  |  |  |
| Ichikawa 2018        |  |  |  |  |  |  |  |  |  |  |
| Igase 2005           |  |  |  |  |  |  |  |  |  |  |
| Igase 2008           |  |  |  |  |  |  |  |  |  |  |
| Ishiyama 2004        |  |  |  |  |  |  |  |  |  |  |
| Iwanami 2013         |  |  |  |  |  |  |  |  |  |  |
| Jeong 2018           |  |  |  |  |  |  |  |  |  |  |
| Jessup 2006          |  |  |  |  |  |  |  |  |  |  |
| Jessup 2008          |  |  |  |  |  |  |  |  |  |  |
| Kaiqiang 2009        |  |  |  |  |  |  |  |  |  |  |
| Kidoguchi 2019       |  |  |  |  |  |  |  |  |  |  |
| Kong 2019            |  |  |  |  |  |  |  |  |  |  |
| Li 2011              |  |  |  |  |  |  |  |  |  |  |
| Li 2013              |  |  |  |  |  |  |  |  |  |  |
| Liang 2015           |  |  |  |  |  |  |  |  |  |  |
| Lin 2016             |  |  |  |  |  |  |  |  |  |  |
| Lizuka 2009          |  |  |  |  |  |  |  |  |  |  |
| Ma 2018              |  |  |  |  |  |  |  |  |  |  |
| Machado 2014         |  |  |  |  |  |  |  |  |  |  |
| Malek 2019           |  |  |  |  |  |  |  |  |  |  |
| Mao-liang Huang 2009 |  |  |  |  |  |  |  |  |  |  |
| Marquez 2014         |  |  |  |  |  |  |  |  |  |  |
| Ocaranza 2006        |  |  |  |  |  |  |  |  |  |  |
| Ohshima 2014         |  |  |  |  |  |  |  |  |  |  |
| Qiao 2015            |  |  |  |  |  |  |  |  |  |  |
| Riera 2014           |  |  |  |  |  |  |  |  |  |  |
| Romani-Perez 2015    |  |  |  |  |  |  |  |  |  |  |
| Sabry 2018           |  |  |  |  |  |  |  |  |  |  |
| Salem 2012           |  |  |  |  |  |  |  |  |  |  |
| Salem 2013           |  |  |  |  |  |  |  |  |  |  |
| Salem 2014           |  |  |  |  |  |  |  |  |  |  |
| Sanchez Aguilar 2018 |  |  |  |  |  |  |  |  |  |  |
| Sanchez-Aguilar 2019 |  |  |  |  |  |  |  |  |  |  |
| Scroggin 2012        |  |  |  |  |  |  |  |  |  |  |
| Senador 2010         |  |  |  |  |  |  |  |  |  |  |
| Shenoy 2009          |  |  |  |  |  |  |  |  |  |  |
| Shimada 2011         |  |  |  |  |  |  |  |  |  |  |
| Shin 2017            |  |  |  |  |  |  |  |  |  |  |
| Soler 2009           |  |  |  |  |  |  |  |  |  |  |
| Song 2012            |  |  |  |  |  |  |  |  |  |  |
| Speth 2014           |  |  |  |  |  |  |  |  |  |  |
| Suh 2019             |  |  |  |  |  |  |  |  |  |  |
| Sukumaran 2012       |  |  |  |  |  |  |  |  |  |  |

|                         |  |  |  |  |  |  |  |  |  |
|-------------------------|--|--|--|--|--|--|--|--|--|
| Takai 2013              |  |  |  |  |  |  |  |  |  |
| Tanno 2016              |  |  |  |  |  |  |  |  |  |
| Thanekar 2019           |  |  |  |  |  |  |  |  |  |
| Varagic 2012            |  |  |  |  |  |  |  |  |  |
| Varagic 2012b           |  |  |  |  |  |  |  |  |  |
| Vuille-dit-Bille 2010   |  |  |  |  |  |  |  |  |  |
| Wang 2012               |  |  |  |  |  |  |  |  |  |
| Wang 2015               |  |  |  |  |  |  |  |  |  |
| Wang 2016               |  |  |  |  |  |  |  |  |  |
| Wang 2016               |  |  |  |  |  |  |  |  |  |
| Wang 2018               |  |  |  |  |  |  |  |  |  |
| Weili 2014              |  |  |  |  |  |  |  |  |  |
| Wosten-van-Asperen 2011 |  |  |  |  |  |  |  |  |  |
| Wu 2015                 |  |  |  |  |  |  |  |  |  |
| Xu 2017                 |  |  |  |  |  |  |  |  |  |
| Yang 2013               |  |  |  |  |  |  |  |  |  |
| Yang 2018               |  |  |  |  |  |  |  |  |  |
| Yisireyili 2018         |  |  |  |  |  |  |  |  |  |
| Yonghong 2016           |  |  |  |  |  |  |  |  |  |
| Zhang 2011              |  |  |  |  |  |  |  |  |  |
| Zhang 2013              |  |  |  |  |  |  |  |  |  |
| Zhang 2014              |  |  |  |  |  |  |  |  |  |
| Zhang 2014              |  |  |  |  |  |  |  |  |  |
| Zhang 2015              |  |  |  |  |  |  |  |  |  |
| Zhao 2015               |  |  |  |  |  |  |  |  |  |
| Zhao 2019               |  |  |  |  |  |  |  |  |  |
| Zhong 2010              |  |  |  |  |  |  |  |  |  |
| Zhong 2011              |  |  |  |  |  |  |  |  |  |
| Zhonghua 2013           |  |  |  |  |  |  |  |  |  |
